# Supplementary material for: New cyclometallated Ru(ii) complex for potential application in photochemotherapy?
Source: Royal Society of Chemistry journal article supplement (doi:10.1039/c3pp50327e), 2013-11-13
Supplement: c3pp50327e.pdf [file c3pp50327e.pdf]

### Supporting Information

## New Cyclometallated Ru(II) Complex for Potential Application in Photochemotherapy

Bryan A. Albani,<sup>§</sup> Bruno Peña,<sup>†</sup> Kim R. Dunbar,<sup>†,\*</sup> Claudia Turro<sup>§,\*</sup>

<sup>§</sup> Department of Chemistry and Biochemistry, The Ohio State University, Columbus, OH

<sup>†</sup> Department of Chemistry, Texas A&M University, College Station, TX

**Table S1.** Crystal Structural Data and Refinement Parameters for [Ru(biq)<sub>2</sub>(phpy)][PF<sub>6</sub>]<sub>2</sub>•2CH<sub>2</sub>Cl<sub>2</sub> (**1**)

|                                                     |                                                                                   |
|-----------------------------------------------------|-----------------------------------------------------------------------------------|
| Formula                                             | C <sub>49</sub> H <sub>36</sub> N <sub>5</sub> F <sub>6</sub> Cl <sub>4</sub> PRu |
| Formula weight                                      | 1082.67                                                                           |
| Crystal size/mm <sup>3</sup>                        | 0.37 x 0.14 x 0.10                                                                |
| Temperature/K                                       | 291(2)                                                                            |
| Crystal system                                      | Monoclinic                                                                        |
| Space group                                         | <i>P</i> 2 <sub>1</sub> / <i>n</i> (No. 14)                                       |
| <i>a</i> /Å                                         | 13.314(3)                                                                         |
| <i>b</i> /Å                                         | 22.497(5)                                                                         |
| <i>c</i> /Å                                         | 15.709(3)                                                                         |
| $\beta$ /deg                                        | 100.67(3)                                                                         |
| <i>V</i> /Å <sup>3</sup>                            | 4623.8(16)                                                                        |
| <i>Z</i>                                            | 4                                                                                 |
| $\rho_{\text{calc}}$ /g•cm <sup>-3</sup>            | 1.555                                                                             |
| <i>F</i> <sub>000</sub>                             | 2184                                                                              |
| $\mu$ /cm <sup>-1</sup>                             | 0.671                                                                             |
| Theta range for data collection/°                   | 1.60 to 27.40                                                                     |
| Reflexions collected                                | 49647                                                                             |
| Independent reflexions                              | 10375 [ <i>R</i> <sub>int</sub> = 0.0609]                                         |
| Data/parameters/restraints                          | 10375/595/0                                                                       |
| Completeness to theta max/%                         | 98.8                                                                              |
| Final <i>R</i> indexes [ <i>I</i> > 2σ( <i>I</i> )] | <i>R</i> 1 <sup><i>a</i></sup> = 0.0637, <i>wR</i> 2 <sup><i>b</i></sup> = 0.1918 |
| Final <i>R</i> indexes [all data]                   | <i>R</i> 1 <sup><i>a</i></sup> = 0.0828, <i>wR</i> 2 <sup><i>b</i></sup> = 0.2107 |
| Goodness-of-fit on <i>F</i> <sup>2</sup>            | 1.075                                                                             |

$$^a R1 = \sum ||F_o| - |F_c|| / \sum |F_o|. \quad ^b wR2 = [ \sum [w(F_o^2 - F_c^2)^2] / \sum [w(F_o^2)^2] ]^{1/2}$$

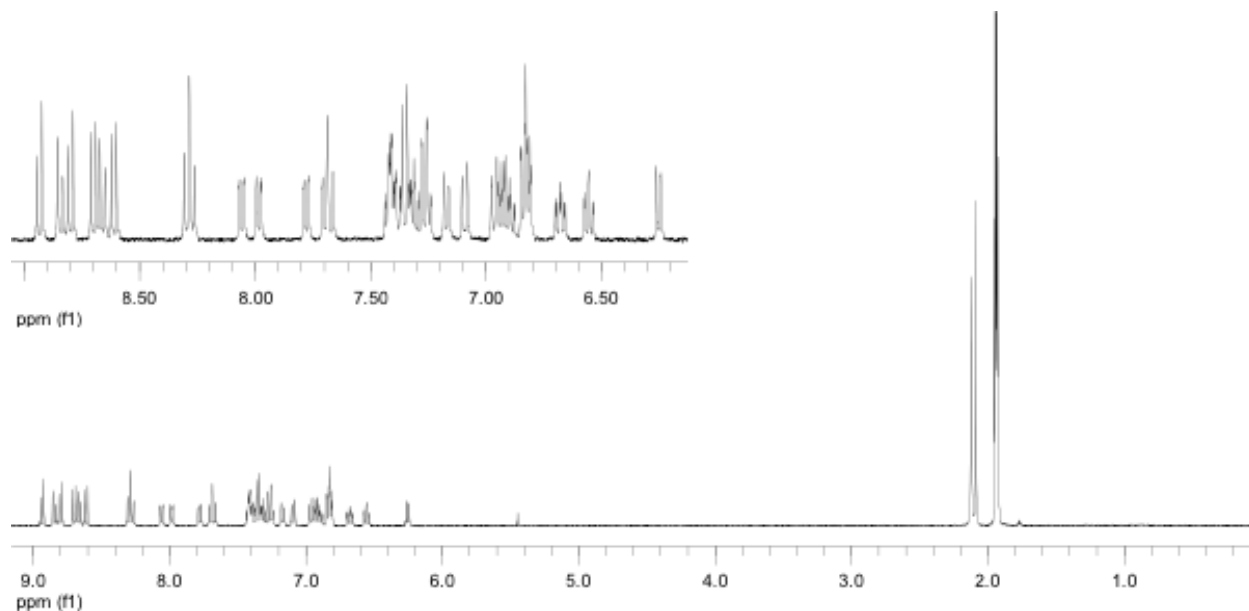

**Figure S1.**  $^1\text{H}$  NMR of **1** in  $\text{CD}_3\text{CN}$ . There are 25 aromatic resonances that correspond to 32 protons.

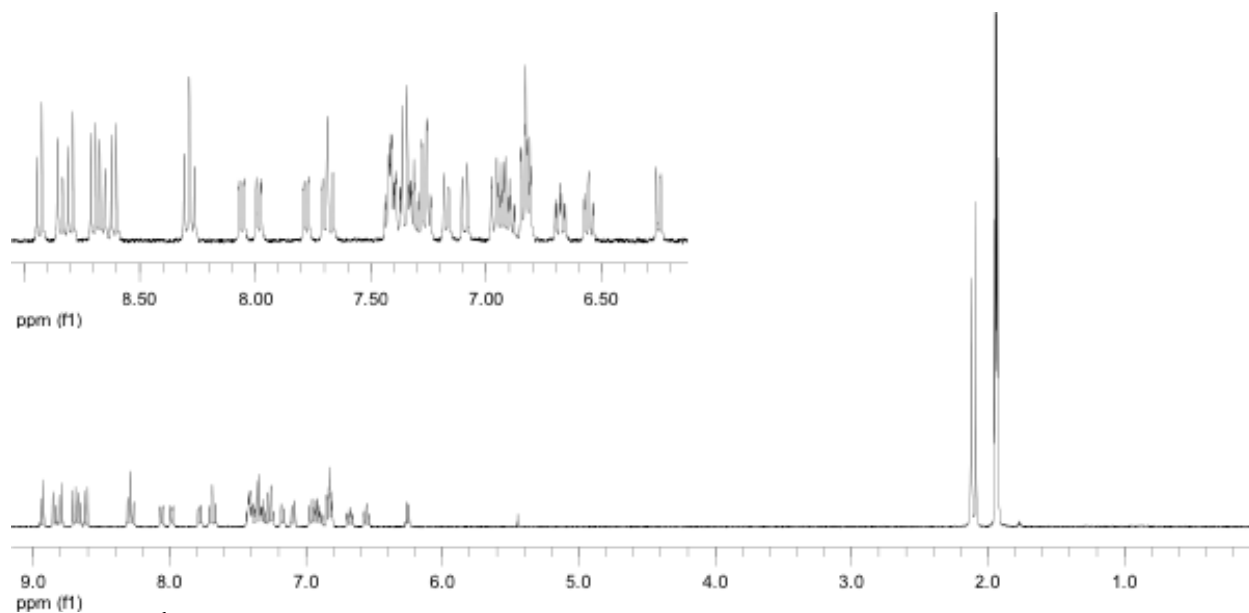

**Figure S2.**  $^1\text{H}$  NMR of **2** in  $(\text{CD}_3)_2\text{CO}$ . There are 14 aromatic resonances that correspond to 32 protons.

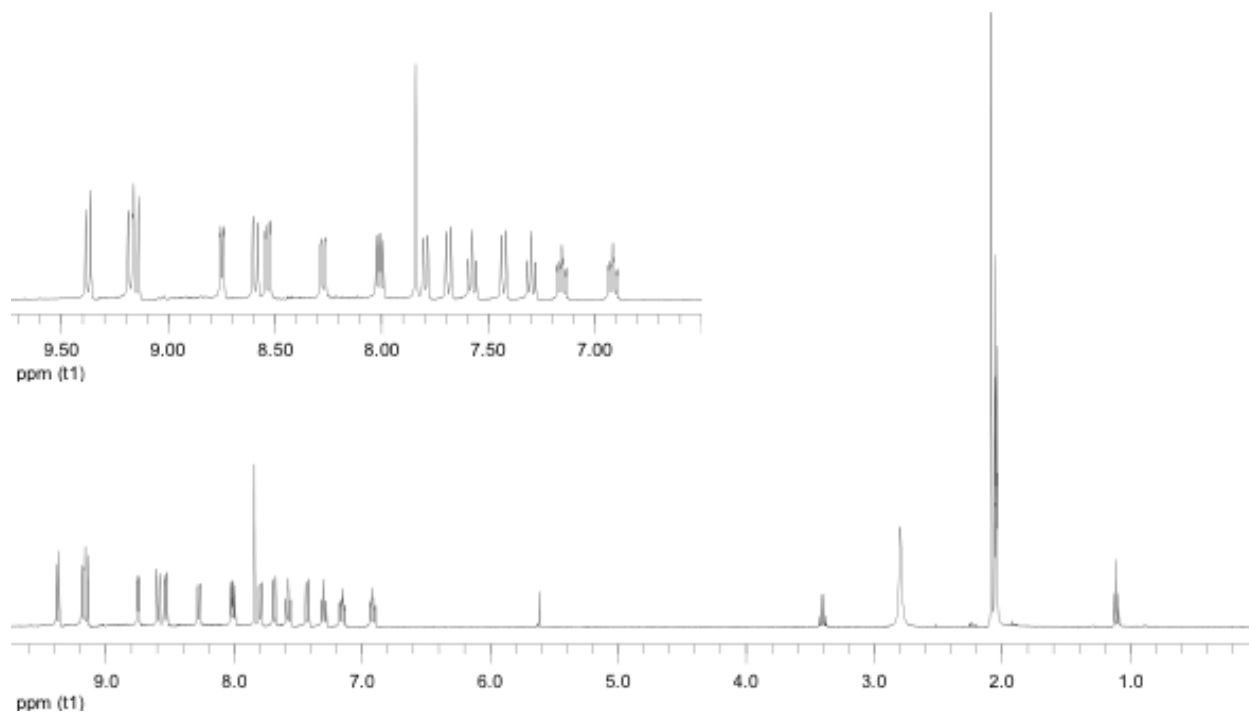

**Figure S3.**  $^1\text{H}$  NMR of **3** in  $(\text{CD}_3)_2\text{CO}$ . There are 15 aromatic resonances that correspond to 32 protons.

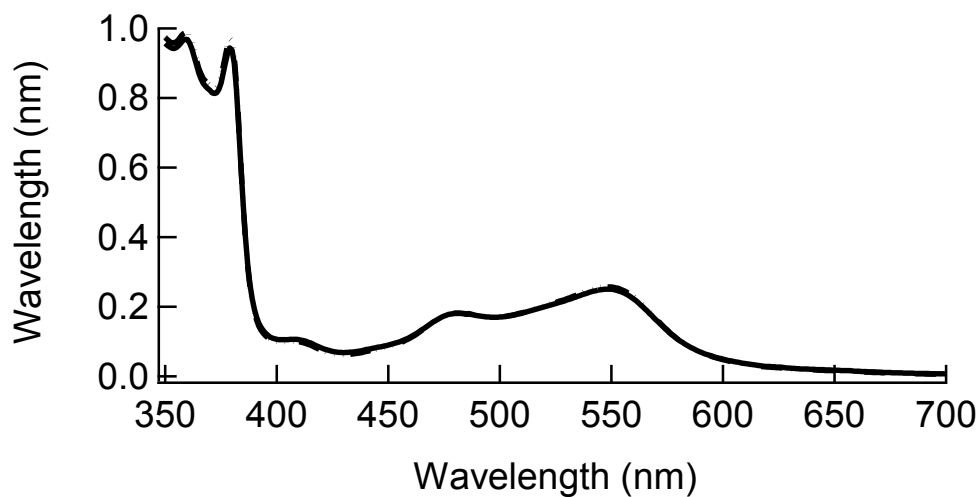

**Figure S4.** Changes to the electronic absorption spectrum of **2** ( $20\ \mu\text{M}$ ) incubated in  $\text{H}_2\text{O}$  for 3 hours at room temperature.

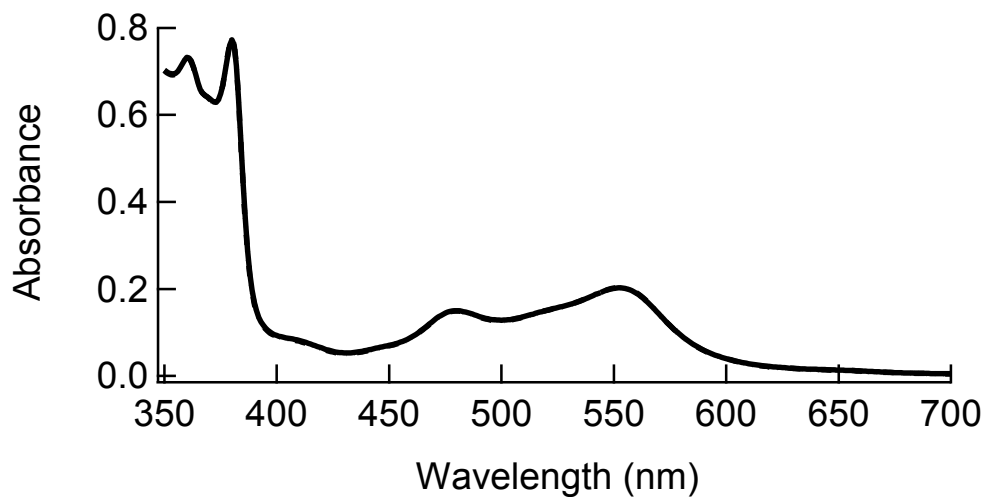

**Figure S5.** Changes to the electronic absorption spectrum of **3** (20 μM) incubated in H<sub>2</sub>O for 3 hours at room temperature.

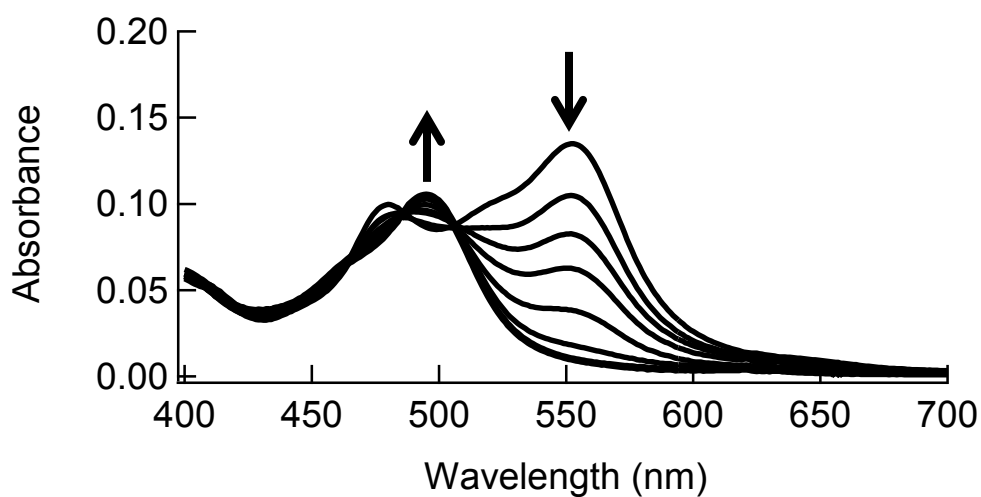

**Figure S6.** Changes to the electronic absorption spectrum of **3** (15 μM) in CH<sub>3</sub>CN with increasing irradiation times: 0, 1, 2, 3, 5, 10, 20, and 30 min ( $\lambda_{\text{irr}} \geq 530$  nm).

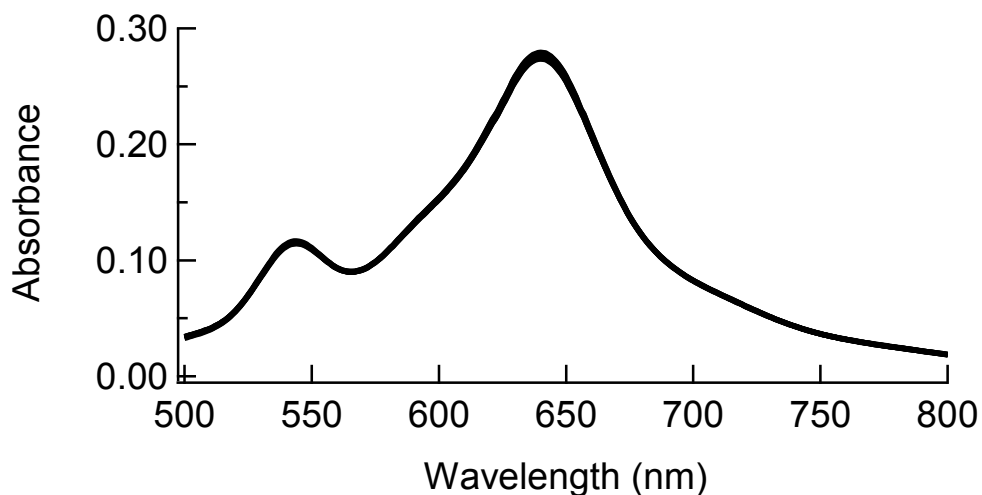

**Figure S7.** Changes to the electronic absorption spectrum of **1** (50  $\mu\text{M}$ ) in  $\text{CH}_3\text{CN}$  with increasing irradiation times: 0, 1, 5, 10, 20, and 30 min ( $\lambda_{\text{irr}} \geq 530$  nm).

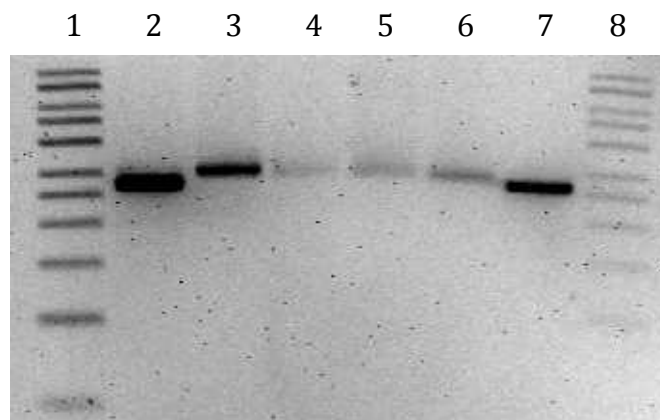

**Figure S8.** Imaged ethidium bromide stained agarose gels in 1xTBE buffer of 50  $\mu\text{M}$  linearized pUC18 plasmid (10mM phosphate buffer, pH = 7.8) in the presence of various concentrations of **3**: lanes 1 and 8, 1 kb DNA molecular weight standard; lanes 2 and 7, linearized plasmid alone; lanes 3-6, 25, 50, 75, 100  $\mu\text{M}$  complex irradiated with  $\lambda_{\text{irr}} \geq 630$  nm ( $t_{\text{irr}} = 30$  min).

**Table S2.** 10 lowest energy singlet excited states obtained from DFT calculations, and the transitions associated with these states in CH<sub>3</sub>CN (H = HOMO, L = LUMO) for complex **1**.

| Wavelength (nm) | <i>f</i> | Calculated Transitions and Orbital Contributions <sup>a</sup> |
|-----------------|----------|---------------------------------------------------------------|
| 839.53          | 0.0013   | H→L(88%), H→L+1(8%)                                           |
| 765.85          | 0.0004   | H→L+1(86%), H→L(9%), H-1→L+1(2%)                              |
| 686.27          | 0.0266   | H-1→L(83%), H-2→L(13%)                                        |
| 636.97          | 0.0288   | H-2→L(46%), H-2→L+1(23%), H-1→L+1(18%), H-1→L(10%)            |
| 606.78          | 0.0397   | H-2→L(39%), H-1→L+1(29%), H-2→L+1(26%)                        |
| 537.81          | 0.0336   | H-2→L+1(42%), H-1→L+1(41%), H→L+3(7%)                         |
| 461.97          | 0.0068   | H→L+2(52%), H→L+4(43%)                                        |
| 455.84          | 0.0122   | H→L+4(46%), H→L+2(39%), H→L+3(10%)                            |
| 438.86          | 0.0396   | H→L+3(76%), H→L+2(5%)                                         |
| 418.32          | 0.0302   | H-1→L+2(85%), H-1→L+4(5%)                                     |

<sup>a</sup>Only contribution ≥5% are listed.

**Table S3.** 10 lowest energy singlet excited states obtained from DFT calculations, and the transitions associated with these states in CH<sub>3</sub>CN (H = HOMO, L = LUMO) for complex **2**.

| Wavelength (nm) | <i>f</i> | Calculated Transitions and Orbital Contributions <sup>a</sup> |
|-----------------|----------|---------------------------------------------------------------|
| 586.3           | 0.0003   | H→L(97%)                                                      |
| 560.87          | 0.00004  | H→L+1(90%), H-1→L+1(4%)                                       |
| 522.69          | 0.0762   | H-1→L(93%)                                                    |
| 514.61          | 0.0041   | H-2→L(96%)                                                    |
| 491.68          | 0.0126   | H-2→L+1(90%), H-1→L(5%)                                       |
| 476.43          | 0.0013   | H→L+2(97%)                                                    |
| 467.09          | 0.0527   | H-1→L+1(76%), H-2→L+2(6%), H→L+1(6%)                          |
| 439.47          | 0.0015   | H-1→L+2(96%)                                                  |
| 404.76          | 0.0388   | H-2→L+2(85%)                                                  |
| 389.55          | 0.005    | H-3→L(95%)                                                    |

<sup>a</sup>Only contribution ≥5% are listed.

**Table S4.** 10 lowest energy singlet excited states obtained from DFT calculations, and the transitions associated with these states in CH<sub>3</sub>CN (H = HOMO, L = LUMO) for complex **3**.

| Wavelength (nm) | <i>f</i> | Calculated Transitions and Orbital Contributions <sup>a</sup> |
|-----------------|----------|---------------------------------------------------------------|
| 587.43          | 0.0004   | H→L(98%)                                                      |
| 550.42          | 0.0002   | H→L+1(89%)                                                    |
| 527.23          | 0.0026   | H-2→L(96%)                                                    |
| 526.72          | 0.0862   | H-1→L(96%)                                                    |
| 493.16          | 0.0037   | H-2→L+1(93%)                                                  |
| 467.2           | 0.0008   | H→L+2 (97%)                                                   |
| 464.34          | 0.0657   | H-1→L+1(75%), H-2→L+2(7%), H→L+1(6%)                          |
| 435.34          | 0.0006   | H-2→L+2(97%)                                                  |
| 420.11          | 0.0005   | H→L+3(72%), H-2→L+2(22%)                                      |
| 399.83          | 0.0208   | H-1→L+3(37%), H-3→L+2(33%), H→L+3(19%)                        |

<sup>a</sup>Only contribution ≥5% are listed.

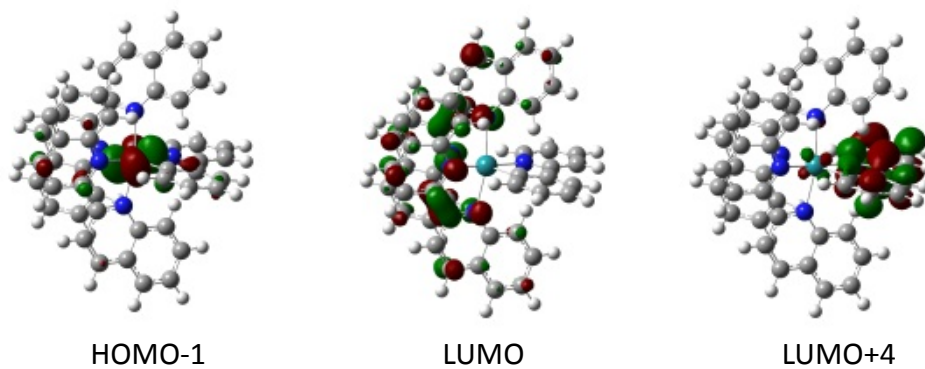

**Figure S9.** Surface images of select molecular orbitals in **1**.

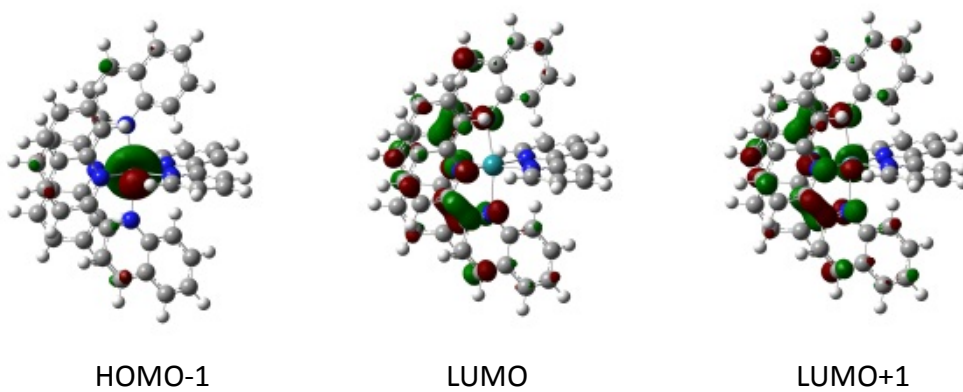

**Figure S10.** Surface images of select molecular orbitals in **2**.

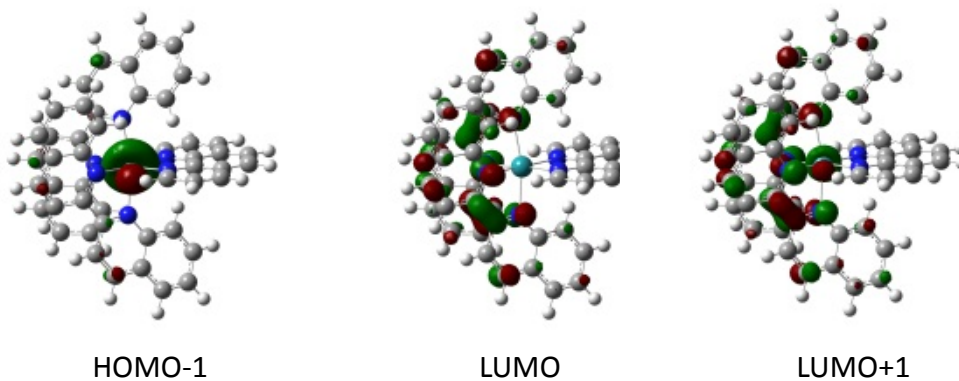

**Figure S11.** Surface images of select molecular orbitals in **3**.
